# Supplementary material
Source: Springer Nature journal article supplement (https://www.springermedizin.de/resource/supplementary/12891_2010_892_MOESM5_ESM.pdf/9506646)
Supplement: MOESM5 [file 9506646]

## PUSH-UP TEST

**Purpose:** To assess dynamic strength of the upper body and the ability to stabilise the trunk.

**Method:** The conscript starts from the lowest face-down position and hands are kept shoulder-wide level. During the push-up, a conscript was first required to fully extend his arms while keeping the body straight with tensed trunk muscles. In the second phase, the body was lowered to the down position with an elbow angle of  $90^{\circ}$ .

**Outcome:** Number of consecutive repeats completed in 60 seconds. Result categories: Excellent ( $\geq 38$ ), Good ( $\geq 30$ ), Fair good ( $\geq 22$ ) and Poor ( $< 22$ ) [repeats].

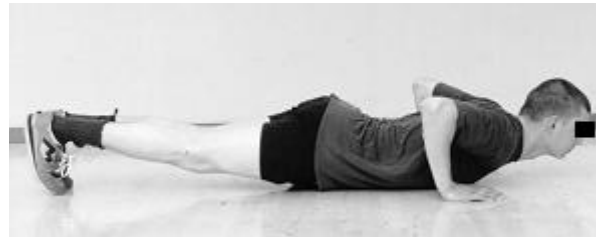

Starting position

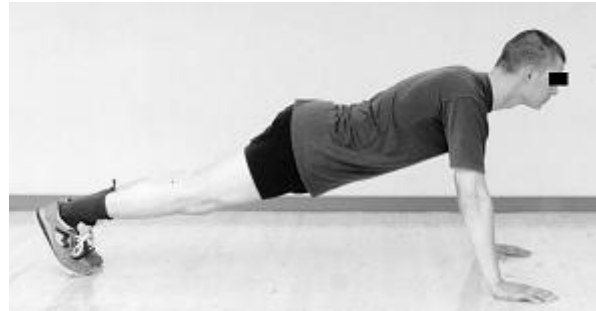

Top position
